# Supplementary material
Source: PubMed Central journal article supplement (PMC1994981)
Supplement: pcbi.0030178.st001.pdf [file pcbi.0030178.st001.pdf]

**Table S1.** Number of protein pairs under each similarity score range for metrics described in Fig. S1. In parenthesis, the number of pairs with at least one domain within the same SCOP family is indicated. We observe that metrics such as  $R_{\min}$  outperform  $N$  at detecting a higher number of protein pairs with a domain within the same SCOP family, but this is done at the expense of being less precise.

| Similarity Score range | $R_{ave}$   | $R_{max}$   | $R_{min}$   | $N$         |
|------------------------|-------------|-------------|-------------|-------------|
| 0                      | 62296 (243) | 62296 (243) | 62296 (243) | 62296 (243) |
| 01-10                  | 1678 (26)   | 3271 (92)   | 995 (21)    | 4487 (122)  |
| 11-20                  | 1719 (41)   | 1053 (73)   | 1446 (22)   | 352 (66)    |
| 21-30                  | 904 (60)    | 371 (49)    | 938 (39)    | 68 (22)     |
| 31-40                  | 407 (53)    | 108 (21)    | 812 (37)    | 30 (17)     |
| 41-50                  | 182 (55)    | 39 (13)     | 344 (39)    | 26 (21)     |
| 51-60                  | 63 (17)     | 17 (7)      | 175 (26)    | 11 (8)      |
| 61-70                  | 12 (3)      | 9 (3)       | 130 (36)    | 6 (5)       |
| 71-80                  | 9 (4)       | 6 (5)       | 86 (26)     | 3 (3)       |
| 81-90                  | 11 (9)      | 5 (4)       | 36 (17)     | 5 (5)       |
| 91-100                 | 4 (2)       | 3 (1)       | 27 (7)      | 1 (1)       |
