# Supplementary material
Source: PubMed Central journal article supplement (PMC1994981)
Supplement: pcbi.0030178.st006.pdf [file pcbi.0030178.st006.pdf]

**Table S6.** Proteins from the test set, using UniProt accession numbers

| <b>Uniprot<br/>accession number</b> |
|-------------------------------------|
| P62877                              |
| P0AF03                              |
| P0A7V0                              |
| P0A6P1                              |
| Q15819                              |
| P0A7S3                              |
| P37351                              |
| P62483                              |
| Q02790                              |
| P0A6L9                              |
| P0A7W1                              |
| P09327                              |
| O60880                              |
| P14900                              |
| P24183                              |
| P09373                              |
| P0A6M4                              |
| P02741                              |
| P0ACJ8                              |
| Q15369                              |
| Q14974                              |
| P07257                              |
| P00492                              |
| P0A6F9                              |
| P12004                              |
| P42224                              |
| P10415                              |
| O15145                              |
| P0A7J0                              |
| P27694                              |
| P07738                              |
| P04802                              |
| P09030                              |
| P27487                              |
| P04995                              |
| Q13564                              |
| P59998                              |
| P30749                              |
| P69797                              |
| P43577                              |
| P02930                              |
| P32377                              |
| Q5TZP7                              |
| P35609                              |
| Q05871                              |
| P0A6C1                              |
| P02932                              |
| P60953                              |
| P00452                              |
| Q99828                              |
| Q53RU0                              |
| P16083                              |
| P67910                              |
| P26783                              |
| P07170                              |
| P0AC81                              |
| P0A6W5                              |
| P15034                              |
| P22139                              |
| P14174                              |

|        |
|--------|
| P54999 |
| P18754 |
| P0A7G6 |
| Q45QG9 |
| P63165 |
| Q32ML5 |
| P41807 |
| P05112 |
| P02787 |
| Q00403 |
| O43924 |
| P32324 |
| P76015 |
| P75960 |
| P14120 |
| P0C0R7 |
| P28631 |
| P25043 |
| P28630 |
| P63096 |
| P11880 |
| P0ABS8 |
| P63177 |
| P30626 |
| Q12341 |
| P62826 |
| P62988 |
| P00962 |
| P22188 |
| P32774 |
| P0A738 |
| P0AAI5 |
| O14717 |
| P68919 |
| P33552 |
| P22301 |
| P99999 |
| P0A8Y5 |
| P0AFG6 |
| P0A749 |
| P00582 |
| P15309 |
| P30748 |
| P08107 |
| P0A6E6 |
| P06169 |
| P20436 |
| P45748 |
| P29373 |
| P68036 |
| P06738 |
| P0A6U5 |
| P62399 |
| P0A7W7 |
| P0ABH9 |
| P68699 |
| Q06609 |
| P0A8A0 |
| P0A7R9 |
| P0A7V8 |
| P02774 |
| P20606 |
| P50465 |
| P06612 |

|        |
|--------|
| Q99418 |
| P31663 |
| P0A780 |
| Q6F108 |
| P60723 |
| P0A7J7 |
| P55957 |
| P49841 |
| P0A6A8 |
| P49366 |
| Q06592 |
| P69924 |
| Q6IBS9 |
| P52298 |
| P0AGK4 |
| P61949 |
| P39958 |
| Q14376 |
| P0A720 |
| P0A7B8 |
| P23528 |
| P27999 |
| P0AG30 |
| P60484 |
| Q3SWW1 |
| P0AEK4 |
| P52286 |
| Q06323 |
| P04179 |
| P09624 |
| P37837 |
| P06730 |
| Q6FHR2 |
| Q06549 |
| Q08209 |
| P26602 |
| Q13616 |
| P60520 |
| P0A722 |
| P02994 |
| P38902 |
| P09467 |
| P17443 |
| P56279 |
| P0A8M3 |
| P08133 |
| P0AA43 |
| P13489 |
| P61769 |
| Q32NC1 |
| P26447 |
| P16622 |
| P05120 |
| P0A7R5 |
| P0A6B7 |
| Q6FGE3 |
| P0A8F8 |
| P0A9Z1 |
| P54885 |
| P0A9X9 |
| P0A6N1 |
| Q96CW1 |
| P0A6Q3 |
| P26441 |

|        |
|--------|
| P0ABQ4 |
| P03956 |
| P10619 |
| P00488 |
| P0ACC7 |
| Q6FHM6 |
| P61970 |
| P42773 |
| P11413 |
| Q5D0F4 |
| P34896 |
| P0A715 |
| P32125 |
| P08519 |
| P21242 |
| P69488 |
| P00918 |
| P0AC38 |
| P0A8N3 |
| P29468 |
| P09382 |
| P48736 |
| P0A7S9 |
| P38074 |
| P32939 |
| P32173 |
| P0AB83 |
| P07858 |
| P23284 |
| P24182 |
| P05748 |
| P63212 |
| P49354 |
| P01033 |
| O00762 |
| P0A7L0 |
| P0A616 |
| P00491 |
| P22141 |
| P55211 |
| P05121 |
| P0A6F1 |
| P51946 |
| P09938 |
| P53141 |
| P49137 |
| Q3KP48 |
| P0AGE9 |
| P0A6H5 |
| P67870 |
| P0A988 |
| Q53Y44 |
| P0A6R3 |
| P0A7T3 |
| P63010 |
| P18510 |
| P0A8H8 |
| P11177 |
| Q13257 |
| Q71DJ3 |
| P11914 |
| P30657 |
| P78417 |
| P00924 |

|             |
|-------------|
| P12281      |
| P0A6G7      |
| P04050      |
| P07711      |
| Q92973      |
| P0A7U3      |
| P0A7V3      |
| P36057      |
| Q5TZY3      |
| P06616      |
| P07274      |
| P07339      |
| P0A7A9      |
| P01857      |
| P06709      |
| P19367      |
| P30153      |
| P32602      |
| P14294      |
| P0AE18      |
| P17169      |
| P69222      |
| Q15370      |
| P0ABZ6      |
| P29466      |
| Q16773      |
| P01040      |
| P52565      |
| P20618      |
| P00374      |
| P20434      |
| P35244      |
| P42330      |
| P15303      |
| Q9UKK6      |
| P14126      |
| P63104      |
| P35813      |
| P0AFG8      |
| P08373      |
| P32449      |
| P0AB71      |
| P08559      |
| P25451      |
| P0ADZ4      |
| O15392      |
| P29460      |
| P01009      |
| gi:51013357 |
| P09038      |
| P04951      |
| P29972      |
| P0A858      |
| P10507      |
| P0A6X7      |
| P30086      |
| P38197      |
| Q5T937      |
| P31373      |
| Q13867      |
| P12956      |
| P29459      |
| P62495      |
| Q16658      |

|        |
|--------|
| P23721 |
| P00579 |
| P08879 |
| P16435 |
| P0AGD7 |
| P21549 |
| P14555 |
| Q6NR85 |
| P0AG44 |
| P62166 |
| P61316 |
| P0A7D1 |
| P0A7C2 |
| Q549E4 |
| P07256 |
| P23909 |
| Q09161 |
| Q06124 |
| Q12522 |
| P07342 |
| Q24117 |
| P46680 |
| P05100 |
| Q9NWT6 |
| P06132 |
| Q5T8W2 |
| P0AE67 |
| P07012 |
| P06756 |
| P61765 |
| P25098 |
| O75531 |
| P00128 |
| P0AG86 |
| P04451 |
| Q5R1M2 |
| P29547 |
| P0A7Y4 |
| O75469 |
| P00560 |
| P22213 |
| P02766 |
| P0A796 |
| P0A817 |
| P0A855 |
| P61175 |
| P68135 |
| P0A7X3 |
| P49888 |
| P0A890 |
| P05091 |
| P08518 |
